# Supplementary material for: Characterizing the non-crosslinked aggregation of DNA-modified gold nanoparticles: effects of DNA length and terminal base pair
Source: Royal Society of Chemistry journal article supplement (doi:10.1039/c9an00822e), 2019-01-01
Supplement: c9an00822e1.pdf [file c9an00822e1.pdf]

## Characterizing the non-crosslinked aggregation of DNA-modified gold nanoparticles: effects of DNA length and terminal base pair

Kae Sato<sup>ab\*</sup>, Kazuo Hosokawa<sup>b</sup>, and Mizuo Maeda<sup>b</sup>

<sup>a</sup>Department of Chemical and Biological Sciences, Faculty of Science, Japan Women's University, Bunkyo, Tokyo 112-8681, Japan

<sup>b</sup>Bioengineering Laboratory, RIKEN Cluster for Pioneering Research, 2-1 Hirosawa, Wako, Saitama 351-0198, Japan

# Supporting Information

### Supporting figures

**Figure S1.** The spectrum of a mixture of probe-A-modified 15-nm GNPs and complementary target DNA

**Figure S2.** The spectrum of probe-A-modified 100-nm GNPs.

**Figure S3.** Testing NCL-GNP-aggregation reversibility.

**Figure S4.** Dot images of temperature-dependent NCL-GNP aggregation.

**Figure S5.** The effects of various terminal sequences.

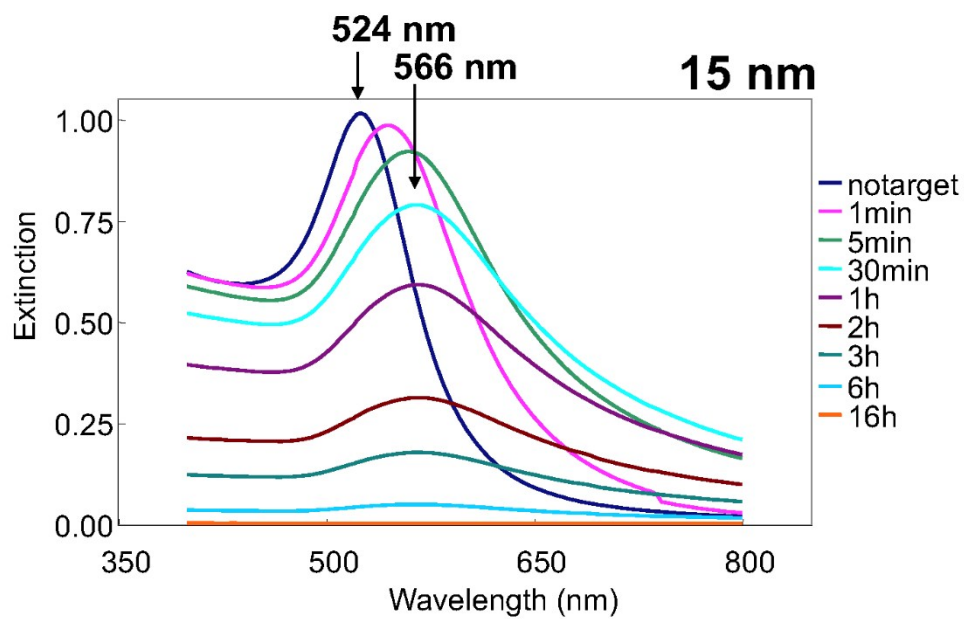

**Figure S1.** The spectrum of a mixture of probe-A-modified GNPs and complementary target DNA (Target A<sub>1</sub>) as a function of time. GNP diameter: 15 nm. Concentrations: probe DNA and target DNA, 500 nM; NaCl, 1.0 M; Tween 20, 0.01%.

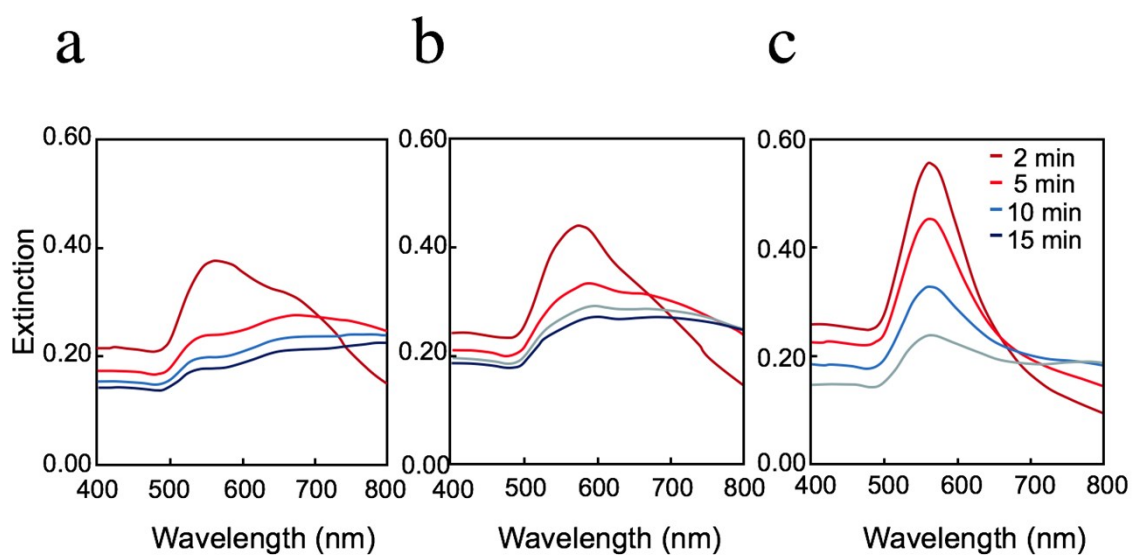

**Figure S2.** The spectrum of probe-A-modified 100-nm GNPs as a function of time. (a) Probe-A-modified GNPs. (b) Probe-A-modified GNPs and complementary target DNA (Target A<sub>1</sub>). (c) Probe-A-modified GNPs and single-base-mismatched target DNA (Target A<sub>8</sub>).

Concentrations: target DNA, 100 nM; NaCl, 1.0 M; Tween 20, 0.01%.

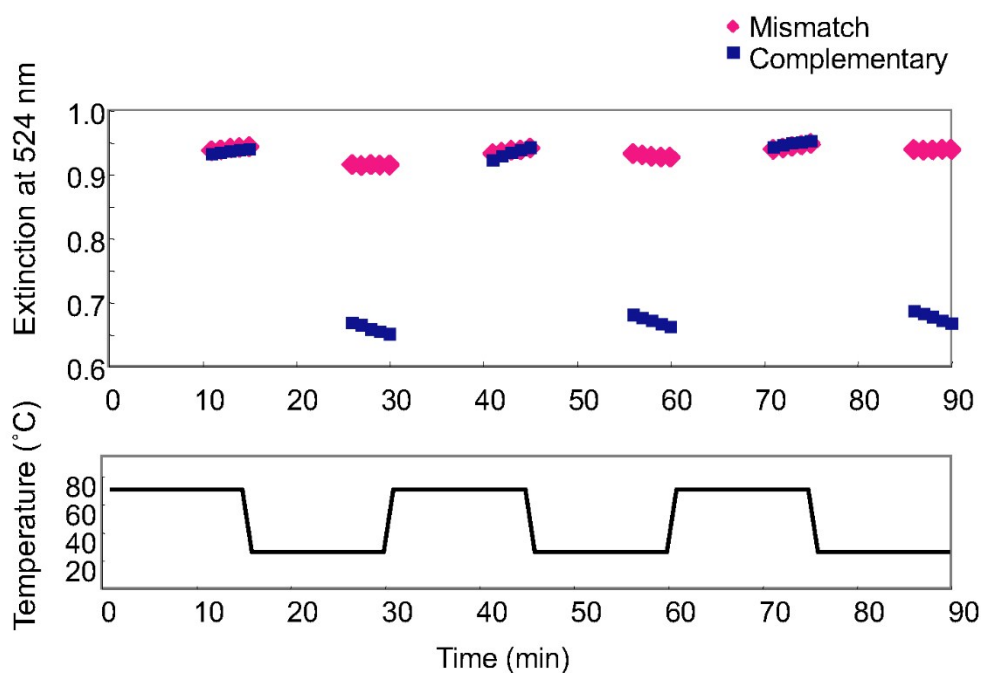

**Figure S3.** Testing NCL-GNP-aggregation reversibility. GNP diameters: 15 nm. Concentrations: probe DNA and target DNA, 500 nM; NaCl, 1.0 M; Tween 20, 0.01%. The temperature was cycled between 25 °C and 70 °C. Temperature-dependent aggregation was observed in the presence of the complementary target in three replicate experiments. The extinction at 524 nm of the mismatched samples did not change during these experiments.

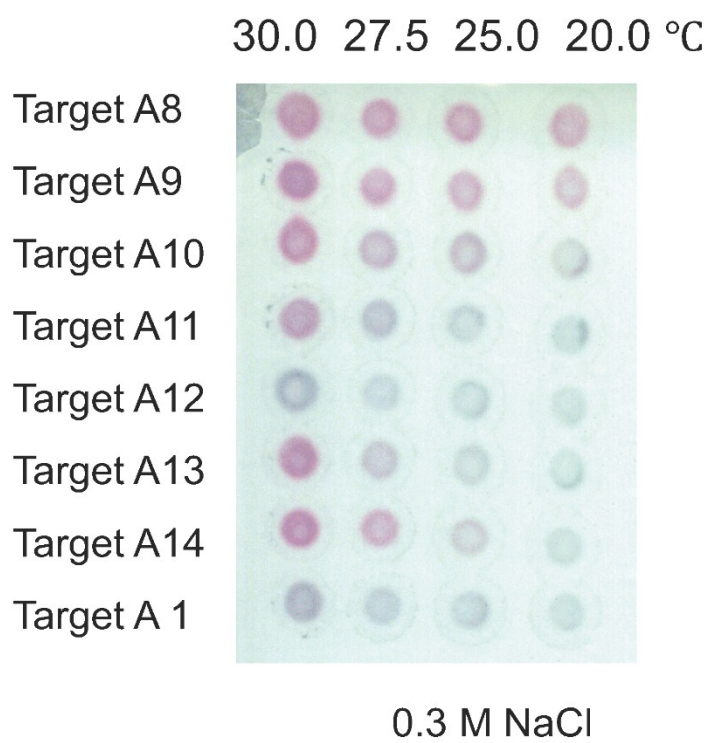

**Figure S4.** Dot images of temperature-dependent NCL-GNP aggregation. GNP diameters: 15 nm.

a

Au-S-5'-CAG GAC AGG CAC AAA CAC-3'5'- TAC GCC ACC AGC T X Y -3'  
 3'-GTC CTG TCC GTG TTT GTG ----- ATG CGG TGG TCG A X Y -5'

b

|      | CG5' | CC5' | CA5' | CT5' | C5'  |
|------|------|------|------|------|------|
| GC3' | 40.0 | <0   | <0   | <0   | 9.0  |
| GG3' | 27.5 | 25.0 | 27.0 | <0   | 9.5  |
| GT3' | 4.5  | <0   | 21.0 | <0   | <0   |
| GA3' | 5.0  | <0   | <0   | 13.5 | <0   |
| G3'  | 8.0  | <0   | <0   | <0   | 25.5 |

|      | GG5' | GCS' | GA5' | GT5' | G5'  |
|------|------|------|------|------|------|
| CC3' | 32.0 | <0   | <0   | <0   | <0   |
| CG3' | <0   | 27.0 | 25.0 | <0   | 11.0 |
| CT3' | <0   | <0   | 14.5 | <0   | <0   |
| CA3' | <0   | <0   | <0   | 9.5  | <0   |
| C3'  | <0   | <0   | <0   | <0   | 32.0 |

|      | TG5' | TCS' | TA5' | TT5' | T5' |
|------|------|------|------|------|-----|
| AC3' | 37.0 | <0   | <0   | <0   | <0  |
| AG3' | 23.0 | 30.5 | 21.5 | <0   | <0  |
| AT3' | <0   | <0   | 27.5 | <0   | <0  |
| AA3' | <0   | <0   | <0   | 12.0 | <0  |
| A3'  | <0   | <0   | <0   | 6.0  | <0  |

|      | AG5' | ACS' | AA5' | AT5' | A5'  |
|------|------|------|------|------|------|
| TC3' | 37.5 | <0   | <0   | <0   | <0   |
| TG3' | 6.5  | 26.0 | 13.5 | <0   | <0   |
| TT3' | <0   | <0   | 25.5 | <0   | 6.0  |
| TA3' | <0   | <0   | <0   | <0   | <0   |
| T3'  | <0   | <0   | <0   | <0   | 21.5 |

NaCl 0.5 M

 complementary

**Figure S5.** The effects of various terminal sequences. GNP diameters: 15 nm. (a) Sequences of the GNP surface probe and the two free DNAs. (b) Listing the aggregation-commencement temperatures.
